# Supplementary material for: A naphthalimide derivative can release COS and form H2S in a light-controlled manner and protect cells against ROS with real-time monitoring ability
Source: Royal Society of Chemistry journal article supplement (doi:10.1039/d0an00371a), 2020-01-01
Supplement: d0an00371a1.pdf [file d0an00371a1.pdf]

## Supporting Information

**A naphthalimide derivative can release COS and form H<sub>2</sub>S in a light controlled manner and protect cells against ROS with real time monitoring ability**

*Wuyang Hua,<sup>a</sup> Jian Zhao,<sup>a, b</sup> Shaohua Gou<sup>a, b\*</sup>*

a. Pharmaceutical Research Center and School of Chemistry and Chemical Engineering, Southeast University, Nanjing 211189, China.

b. Jiangsu Province Hi-Tech Key Laboratory for Bio-medical Research, Southeast University, Nanjing 211189, China.

### 1. Experimental section

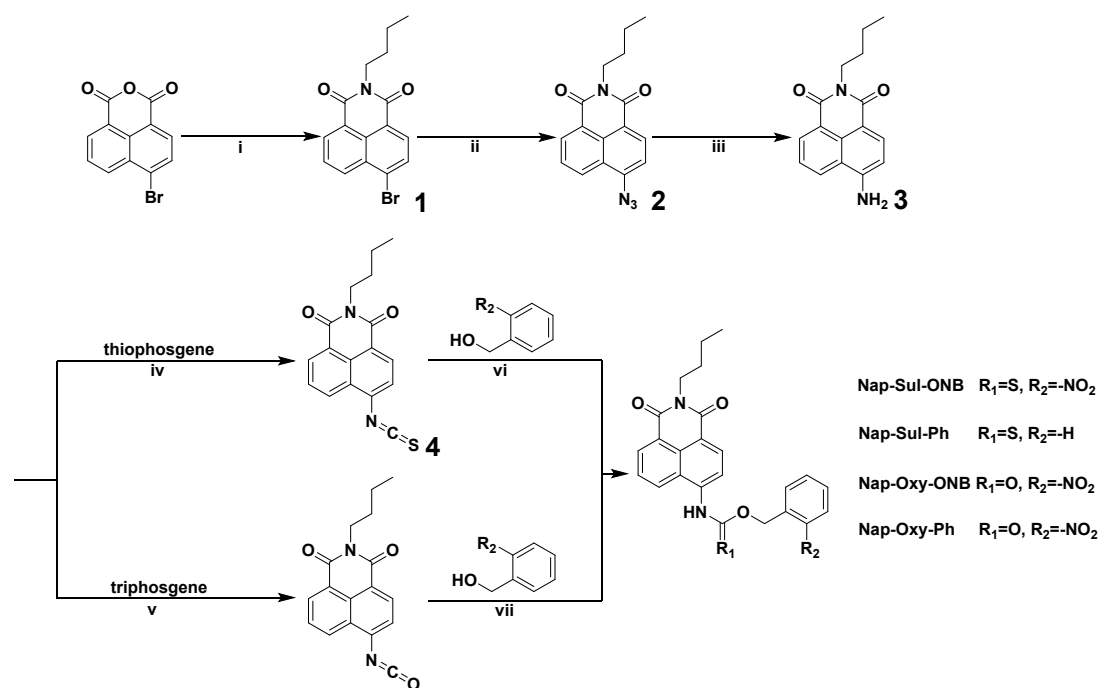

**Scheme S1.** Synthetic procedure of the targeted compounds. i. n-butylamine, EtOH, reflux, overnight. ii. NaN<sub>3</sub>, DMF, 100 °C, overnight. iii.

Na<sub>2</sub>S, DMF, 4 h. iv. THF, DMAP, DIPEA. v. toluene, DMAP, DIPEA. vi. NaH, THF, 0 °C-r.t., overnight. vii. DIPEA, toluene, 0 °C-r.t., overnight.

*UV-Vis photolysis experiments:* All the tested compounds were dissolved in a mixed solvent (10 μM in 0.01 mM PBS, pH=7.4, containing 10 % DMSO). The UV-Vis absorption spectrum were recorded after samples were irradiated by a 365 nm LED (6.30 mW/cm<sup>2</sup>) for every 2 min and the total light dose was 7.56 J/cm<sup>2</sup>.

*Fluorescence emission photolysis experiments:* The sample of Nap-Sul-ONB and Nap-Oxy-ONB (10 μM in 0.01 mM PBS, pH=7.4, containing 10 % DMSO, respectively) were irradiated by a 365 nm LED (6.30 mW/cm<sup>2</sup>) for every 2 min after which the emission spectrum were recorded. The total light dose was 7.56 J/cm<sup>2</sup>. For comparing experiment, the power density was down-regulated as 3.15 mW/cm<sup>2</sup>. Excitation wavelength: 435 nm. Ex slit=5 nm. Em slit=5 nm.

*Methylene blue (MB) assay:* The experiment methods was conducted according to previous reports[1,2] with some modification. Briefly, for each phial filled with 5 mL of PBS (0.01 mM, pH=7.4, containing 25 μg/mL of CA and 0.5 % of zinc acetate), 25 μL of Nap-Sul-ONB or Nap-Oxy-ONB (20 mM in DMSO, respectively) was added and mixed slowly. After irradiated by a 365 nm LED (6.30 mW/cm<sup>2</sup>) for varied durations, 2.5 mL of the solution was taken out from each phial and mixed with 2.5 mL of MB reagent (a mixture of 1.25 mL of 30 mM FeCl<sub>3</sub> in 1.2 M HCl and

1.25 mL of 20 mM N,N-dimethyl-p-phenylene diamine in 7.2 M HCl), respectively. The solution was incubated for 2 h at 37 °C. Then the absorption spectrum was recorded. The calibration curve was also obtained following the previous reports[1,2]. The maximal light dose was 7.56 J/cm<sup>2</sup>.

*Cell culture methods:* MCF-7 cells were cultured in 5 % CO<sub>2</sub> at 37 °C with RPMI-1640 containing penicillin/streptomycin (Beyotime, Nantong, China) and 10% fetal bovine serum (FBS) (Hyclone, Lifescience, USA).

*Cellular signal response/cellular accumulation experiments:* MCF-7 cells were cultured in a glass bottom cell-culture dish with a culture medium (0.1% DMSO, v/v) containing 20 μM of Nap-Sul-ONB for 4 h. Then the cells were taken to LCSM to obtain the cell images after indicated period time of irradiation (365 nm LED, 6.30 mW/cm<sup>2</sup>, 2 or 30 min). The light dose was 0.76 and 11.34 J/cm<sup>2</sup>, respectively.  $\lambda_{EX}$ = 405 nm,  $\lambda_{EM}$ = 500-580 nm.

*Cell protective effect against exogenous ROS:* [3,4] MCF-7 cells were cultured with a culture medium containing 50 μM of H<sub>2</sub>O<sub>2</sub> for 30 min. After that, the cells were incubated with 20 μM of Nap-Sul-ONB for 4 h and irradiated by 365 nm light (LED, 6.30 mW/cm<sup>2</sup>) for 30 min, which the light dose was 11.34 J/cm<sup>2</sup>. Next, the culture medium was removed and the cells were incubated with 0.5 mL of DCFH-DA work solution (5 μM) for 30 min. After washed with PBS (0.01 mM, pH=7.4, 1 mL×3), the cells were

taken to LCSM to detected the fluorescence signal of ROS.  $\lambda_{EX}= 488$  nm,  $\lambda_{EM}= 520-550$  nm.

*Cell protective effect against endogenous ROS:*[4] MCF-7 cells were cultured in a glass bottom cell-culture dish with a culture medium (no serum, containing  $1\mu\text{g}/\text{mL}$  of PMA) for 1 h. After that, the cells were incubated with  $20\ \mu\text{M}$  of Nap-Sul-ONB for 4 h and irradiated by 365 nm light (LED,  $6.30\ \text{mW}/\text{cm}^2$ ) for 30 min with a light dose of  $11.34\ \text{J}/\text{cm}^2$ . Then the culture medium was removed and the cells were incubated with  $0.5\ \text{mL}$  of DCFH-DA work solution ( $5\ \mu\text{M}$ ) for 30 min. After washed with PBS ( $0.01\ \text{mM}$ ,  $\text{pH}=7.4$ ,  $1\ \text{mL}\times 3$ ), the cells were taken to LCSM to detected the fluorescence signal of ROS.  $\lambda_{EX}= 488$  nm,  $\lambda_{EM}= 520-550$  nm.

*Cytotoxicity assay:*[4,5] MCF-7 cells were plated in 96-well plates at a density of approximately  $10^5/\text{ml}$  per well. The cells were exposed to  $1\mu\text{g}/\text{mL}$  of PMA in serum-free growth media for 1 h. Then the cells were administrated with varied concentrations of Nap-Sul-ONB (in cell culture media) for 4 h and irradiated with 365 nm light (LED,  $6.30\ \text{mW}/\text{cm}^2$ ) for 30 min (Light dose= $11.34\ \text{J}/\text{cm}^2$ ). After incubated for further 24 h at  $37\ ^\circ\text{C}$ , culture media were removed. To every well,  $100\ \mu\text{L}$  of MTT ( $0.5\ \text{mg}/\text{mL}$ ) was added and the cells were incubated for 4 h at  $37\ ^\circ\text{C}$  in  $5\ \%$   $\text{CO}_2$ . Next, the supernate was removed carefully and  $100\ \mu\text{L}$  of DMSO was added into each well. Finally, the absorption at 490 nm was measured by microplate reader.[5]

*Live/dead cell co-staining assay:* MCF-7 cells were exposed to 1  $\mu\text{g}/\text{mL}$  of PMA in serum-free growth media for 1 h. Then the cells were incubated with 20  $\mu\text{M}$  of Sul-Nap-ONB for 4 h and irradiated with 365 nm light (LED, 6.30  $\text{mW}/\text{cm}^2$ ) for 5 or 30 min (The light dose was 1.89 or 11.34  $\text{J}/\text{cm}^2$ ). After that, the cells were washed with PBS (0.01 mM, pH = 7.4, 1 mL  $\times$  3) and further treated with calcein AM and propidium iodide (5  $\mu\text{M}$  respectively) for 30 min, followed by washing with PBS. Finally the samples were measured by LSCM. Red:  $\lambda_{\text{EX}} = 561 \text{ nm}$ ,  $\lambda_{\text{EM}} = 600\text{--}640 \text{ nm}$ . Green:  $\lambda_{\text{EX}} = 488 \text{ nm}$ ,  $\lambda_{\text{EM}} = 500\text{--}540 \text{ nm}$ .

## 2. Figures

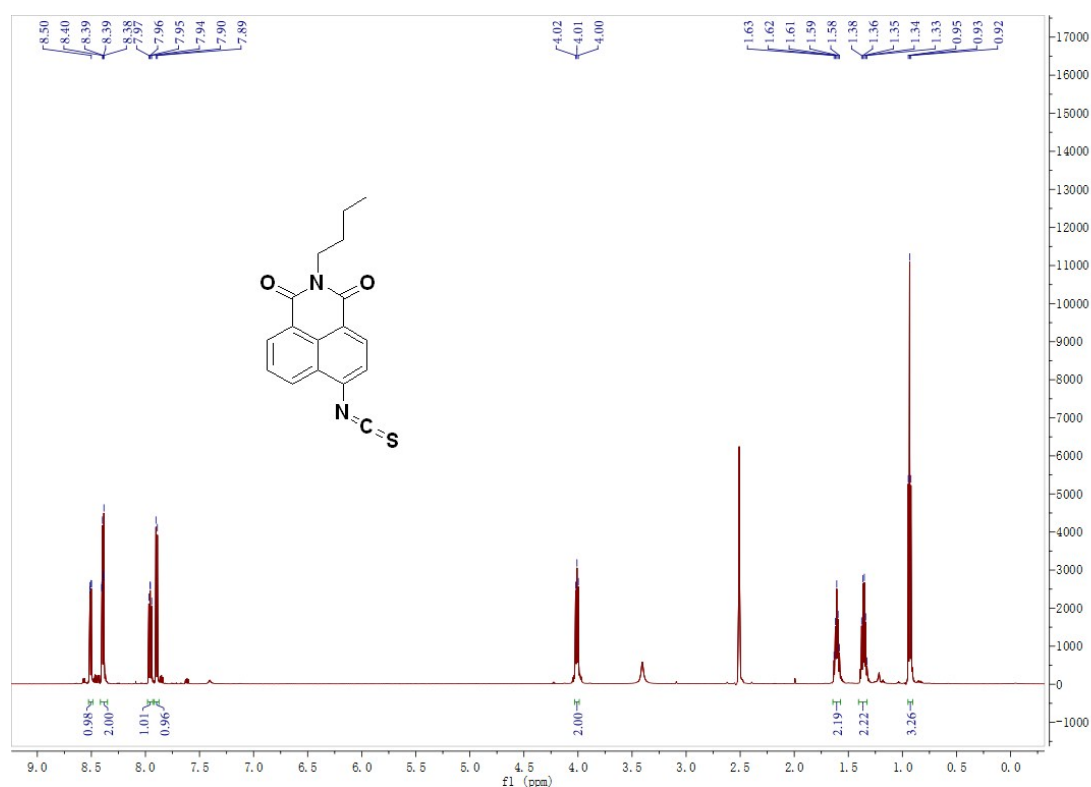

**Fig. S1**  $^1\text{H}$  NMR spectrum of Intermediate 4. (DMSO- $d_6$ )

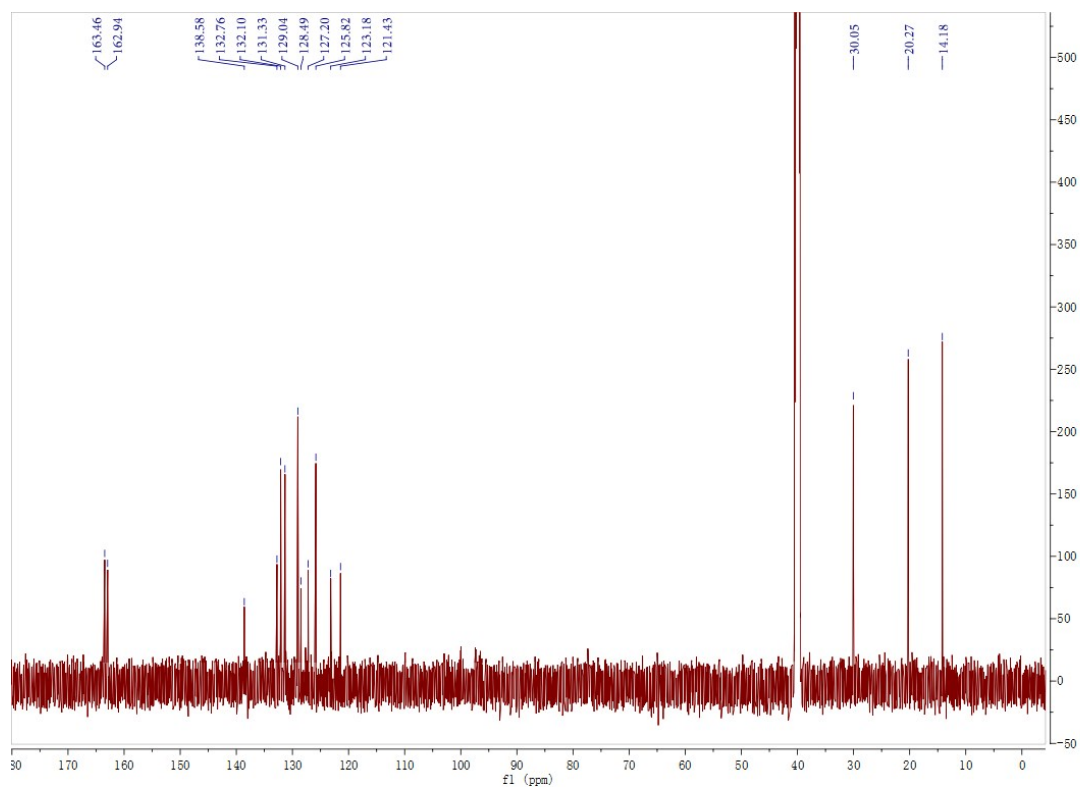

**Fig. S2**  $^{13}\text{C}$  NMR spectrum of Intermediate 4. (DMSO- $d_6$ )

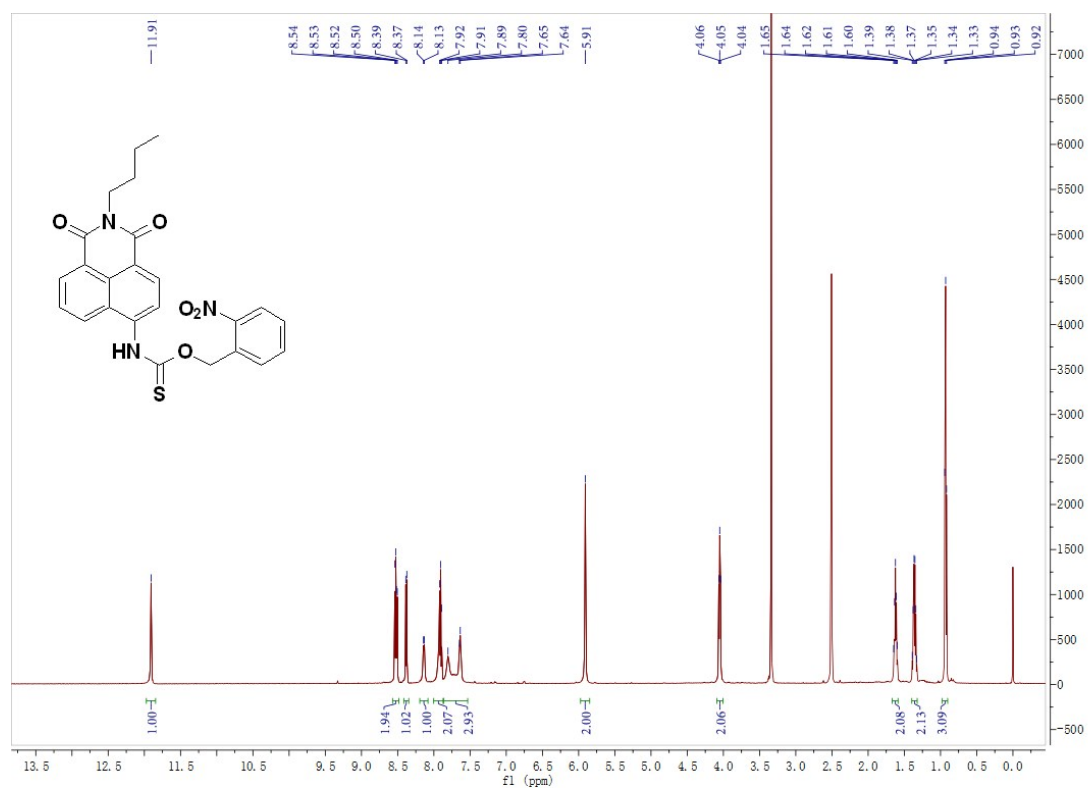

**Fig. S3**  $^1\text{H}$  NMR spectrum of Nap-Sul-ONB. (DMSO- $d_6$ )

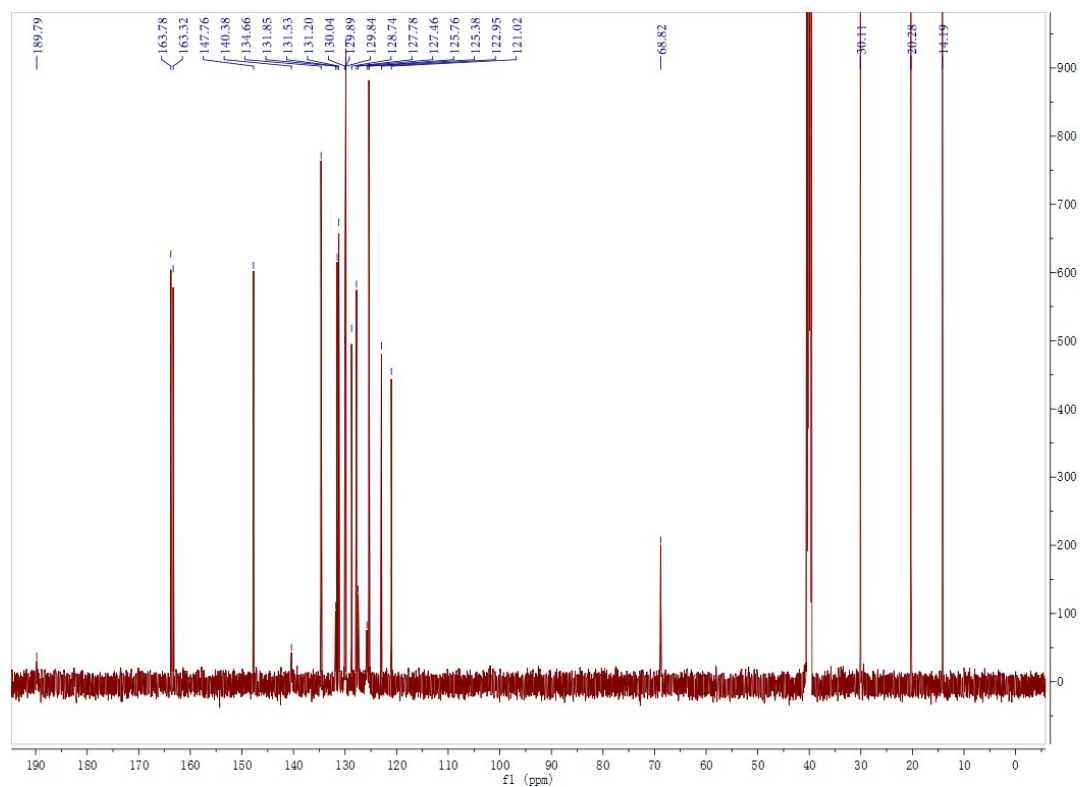

**Fig. S4**  $^{13}\text{C}$  NMR spectrum of Nap-Sul-ONB. (DMSO- $d_6$ )

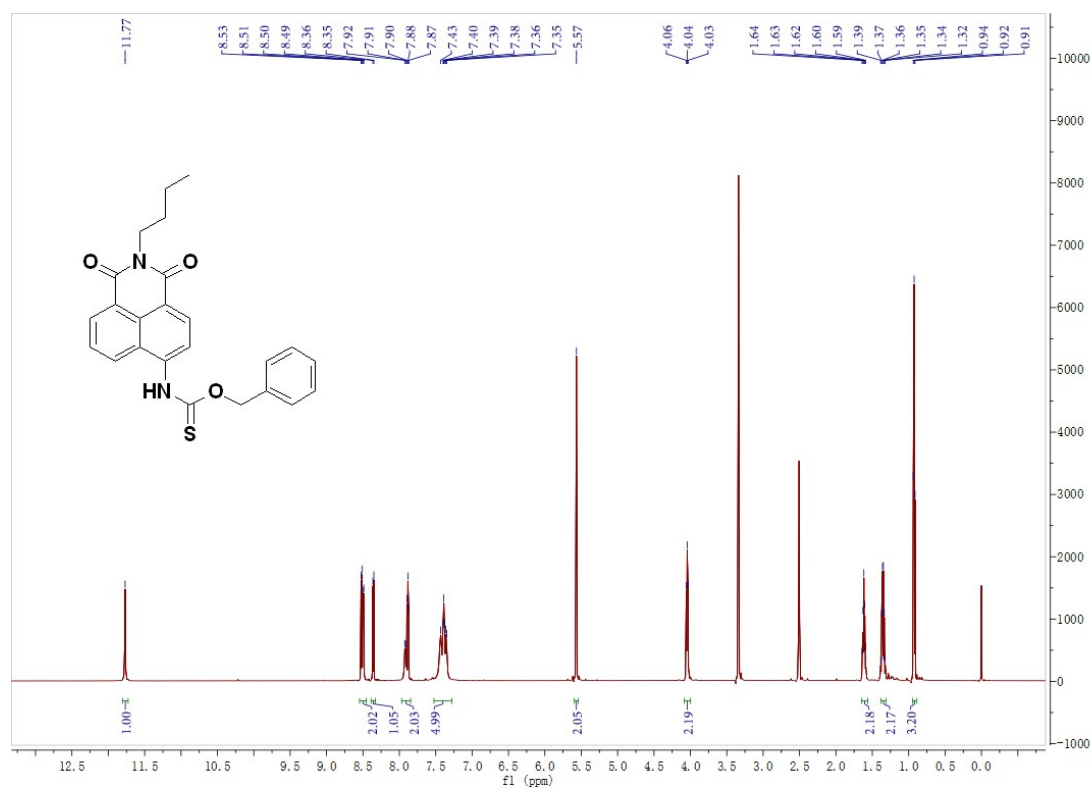

**Fig. S5**  $^1\text{H}$  NMR spectrum of Nap-Sul-Ph. (DMSO- $d_6$ )

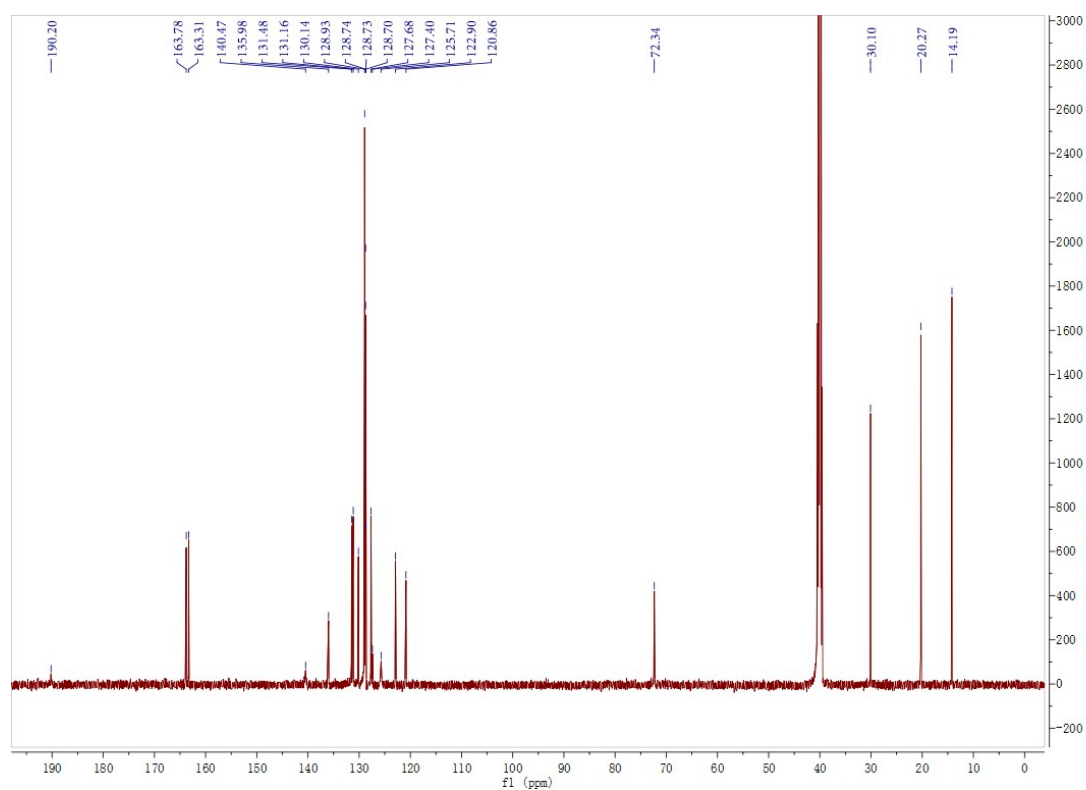

**Fig. S6** <sup>13</sup>C NMR spectrum of Nap-Sul-Ph. (DMSO-d<sub>6</sub>)

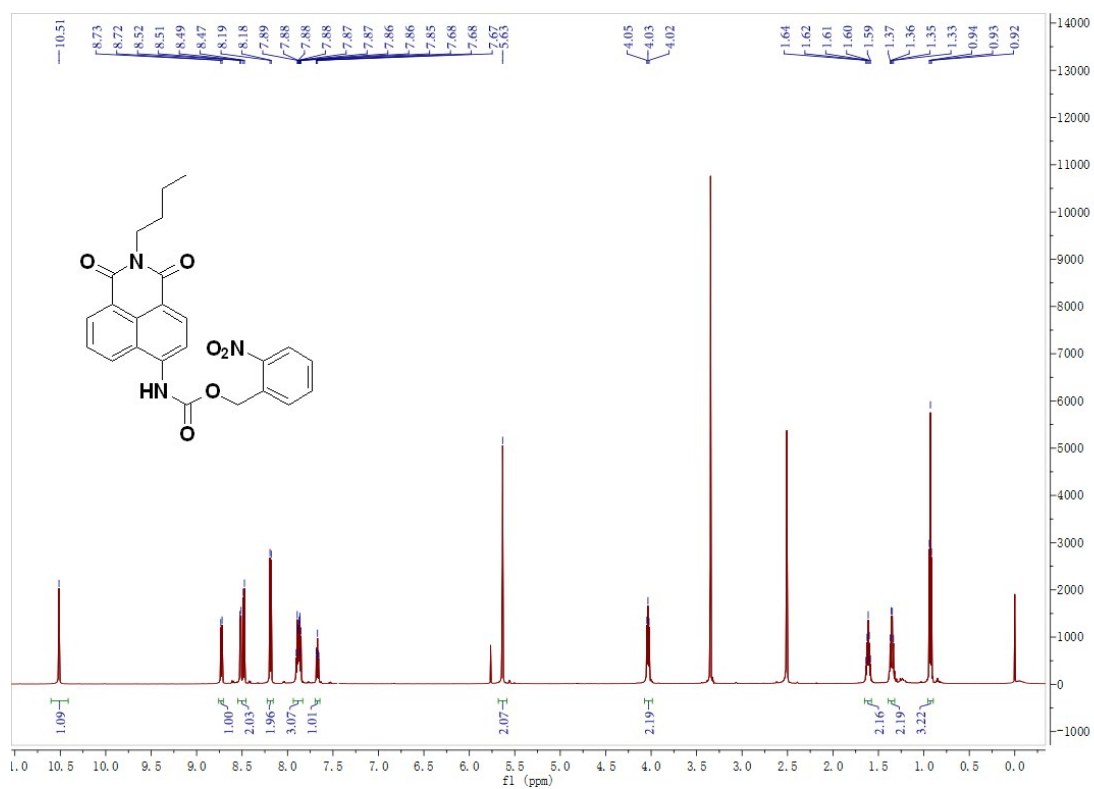

**Fig. S7** <sup>1</sup>H NMR spectrum of Nap-Oxy-ONB. (DMSO-d<sub>6</sub>)



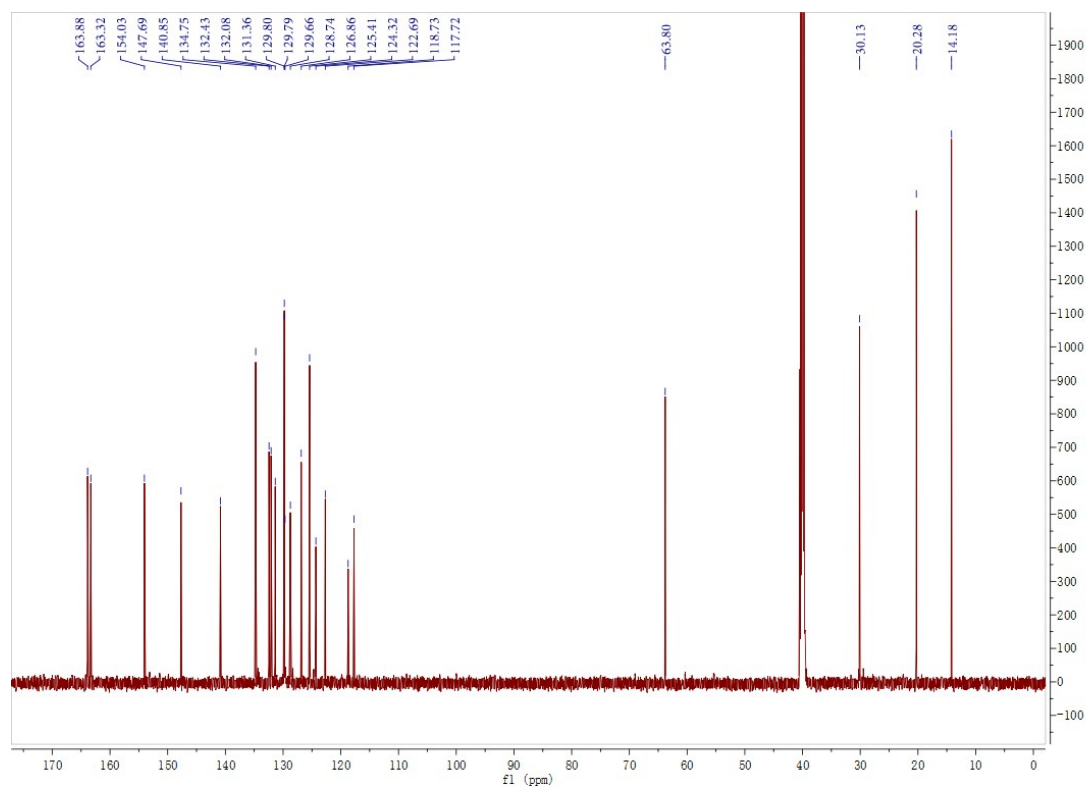

**Fig. S8**  $^{13}\text{C}$  NMR spectrum of Nap-Oxy-ONB. (DMSO-d<sub>6</sub>)

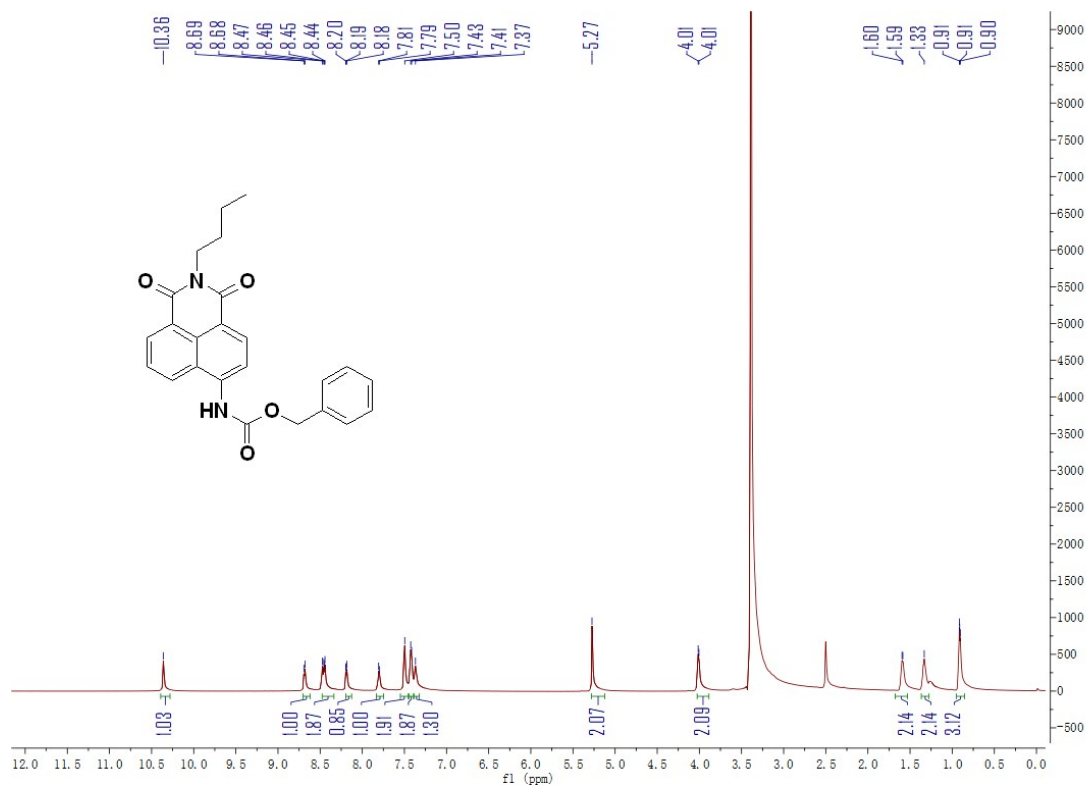

**Fig. S9**  $^1\text{H}$  NMR spectrum of Nap-Oxy-Ph. (DMSO-d<sub>6</sub>)

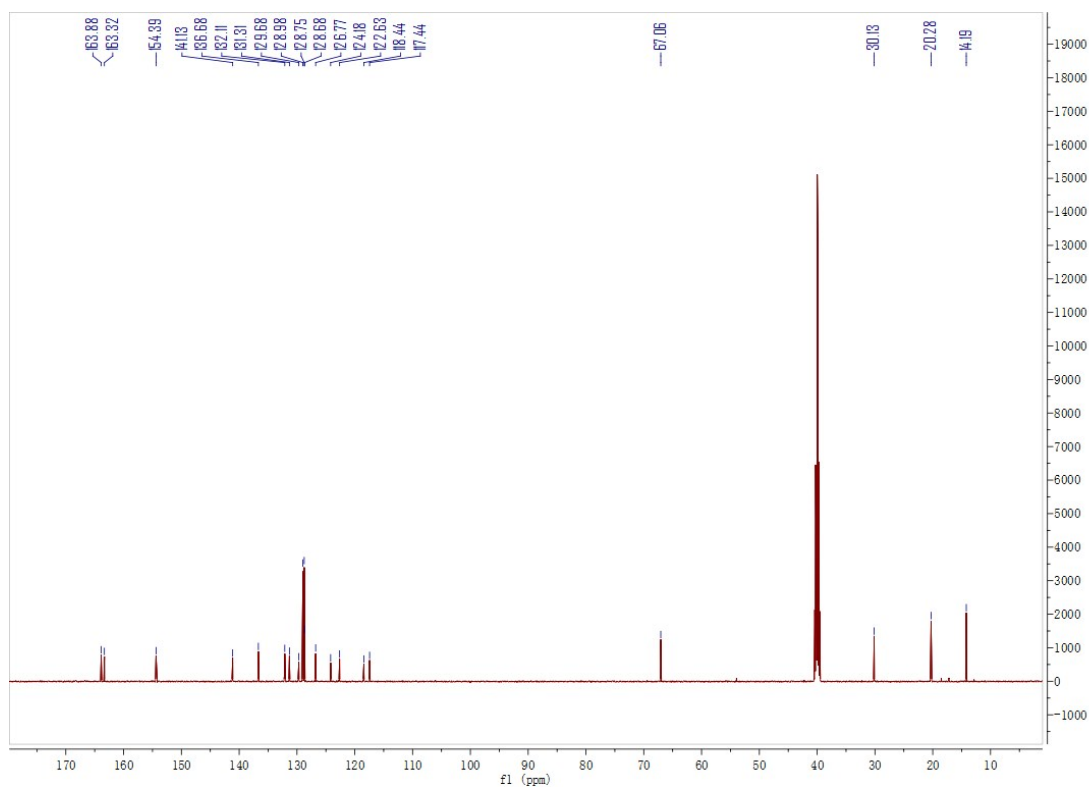

**Fig. S10** <sup>13</sup>C NMR spectrum of Nap-Oxy-Ph. (DMSO-d<sub>6</sub>)

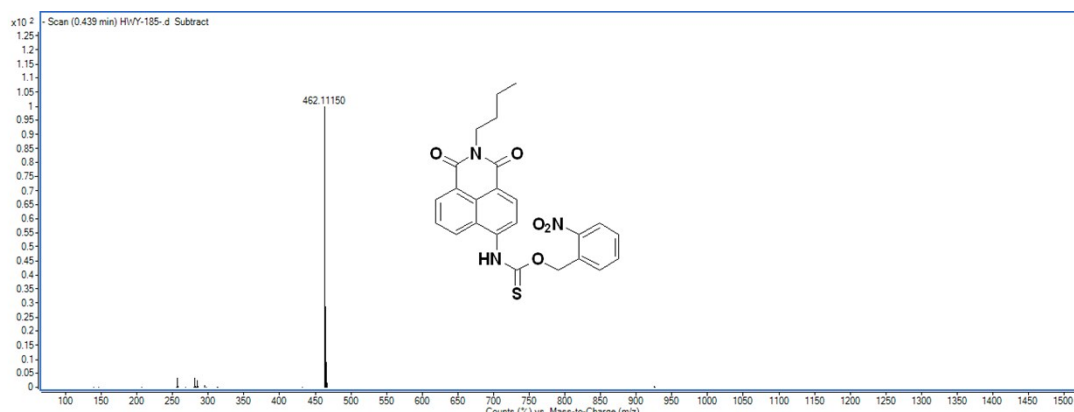

**Fig. S11** ESI-HRMS diagram of Nap-Sul-ONB.

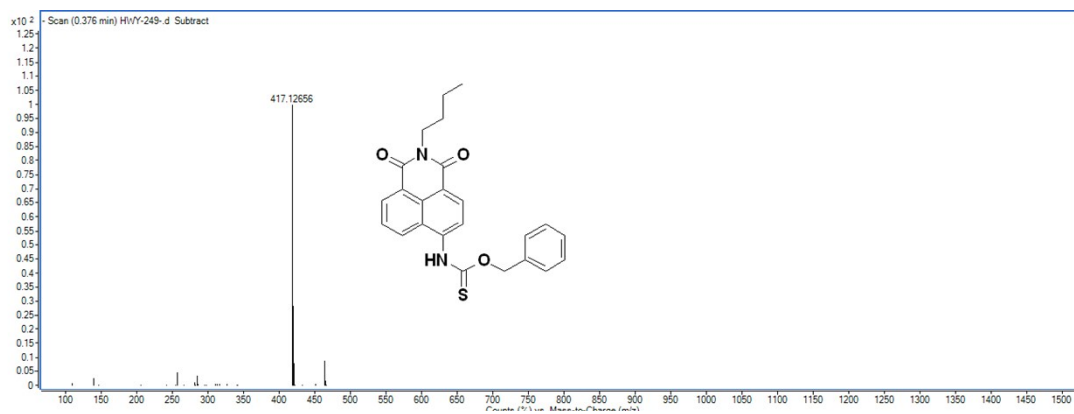

**Fig. S12** ESI-HRMS diagram of Nap-Sul-Ph.

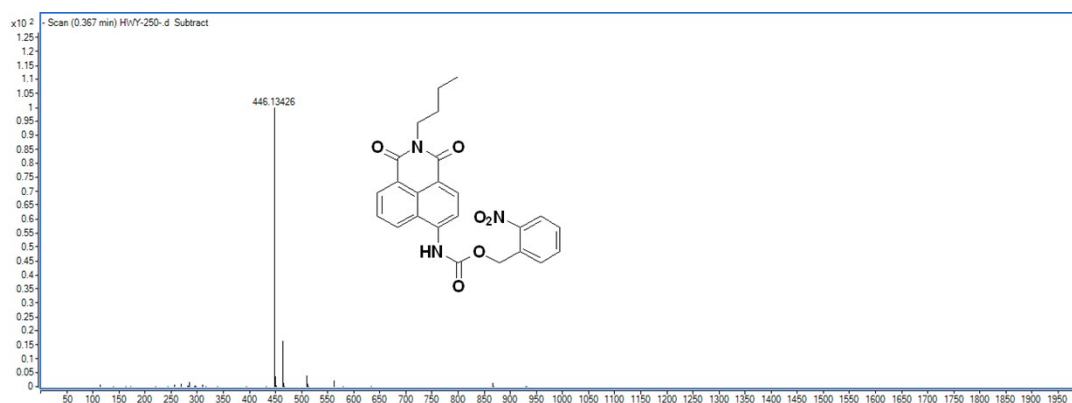

**Fig. S13** ESI-HRMS diagram of Nap-Oxy-ONB.

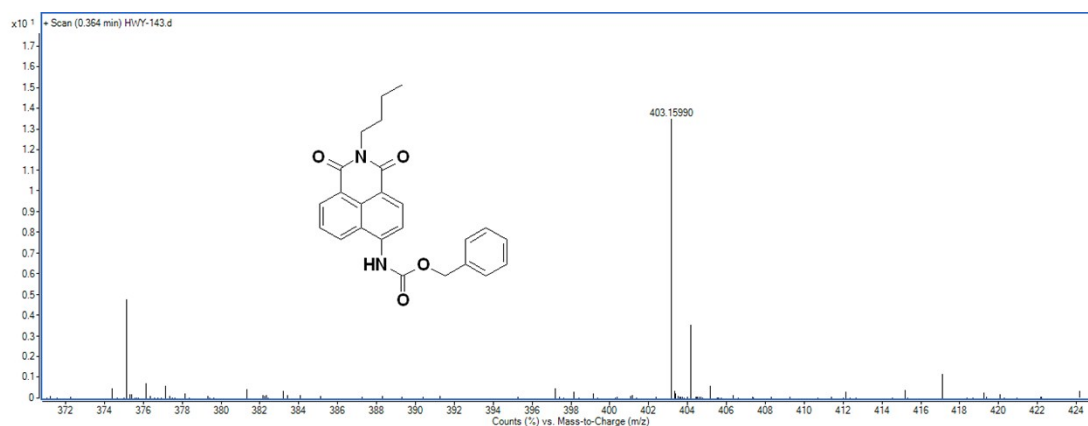

**Fig. S14** ESI-HRMS diagram of Nap-Oxy-Ph.

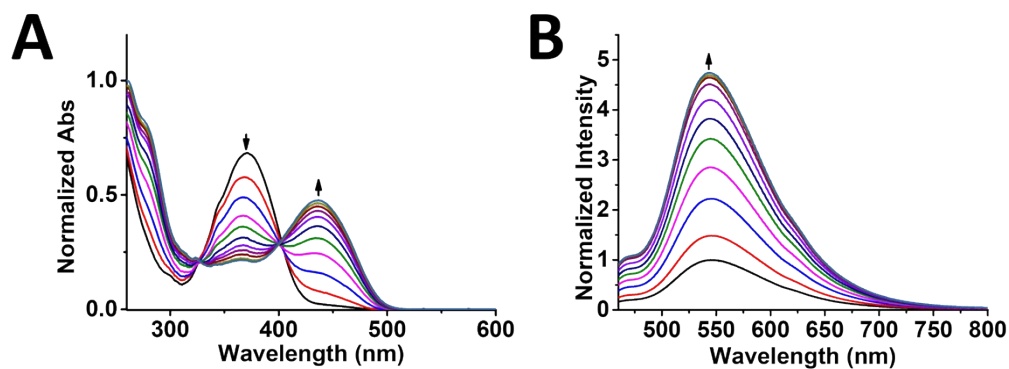

**Fig. S15** UV-Vis absorption and fluorescence emission photolysis experiments of **Nap-Oxy-ONB**. (A) UV-Vis absorption photolysis of **Nap-Oxy-ONB**. (B) Fluorescence emission photolysis of **Nap-Oxy-ONB**. The excitation wavelength was 435 nm.

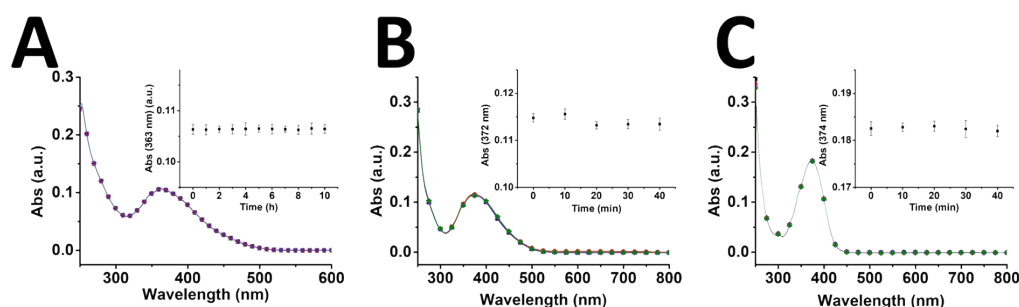

**Fig. S16** UV-Vis absorption of (A) **Nap-Sul-ONB** in dark and photolysis experiments of (B) **Nap-Sul-Ph** and (C) **Nap-Oxy-Ph**. The data are representative of three independent experiments and shown as the mean  $\pm$  S.D.

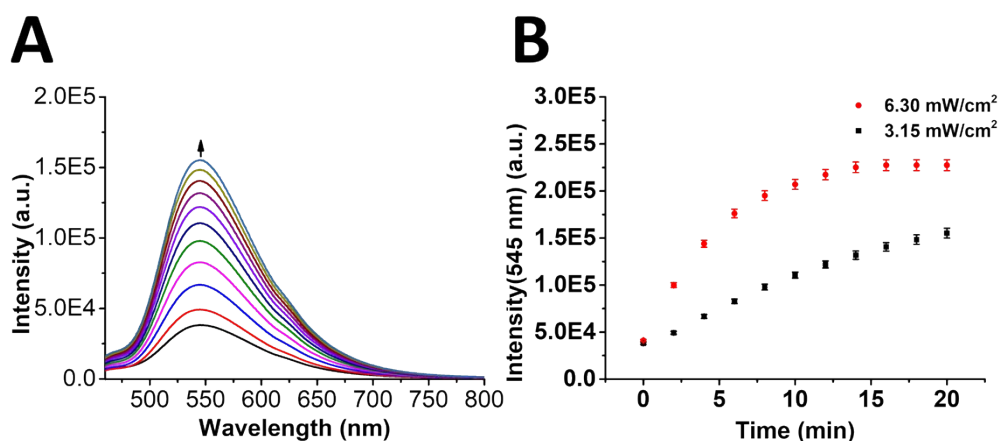

**Fig. S17** (A) Fluorescence emission spectra response of **Nap-Sul-ONB** towards the irradiation of 365 nm light (3.15 mW/cm<sup>2</sup>). (B) Fluorescence intensity response of **Nap-Sul-ONB** under the trigger of 365 nm light with different power density. The data are representative of three independent experiments and shown as the mean  $\pm$  S.D.

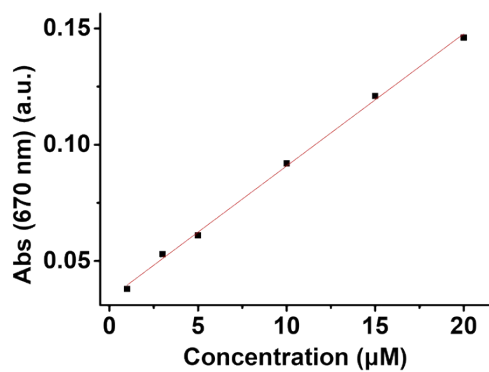

**Fig. S18** Calibration curve of MB assay. Equation:  $y=0.03399+ 0.00569x$ ,  
R-square=0.99777.

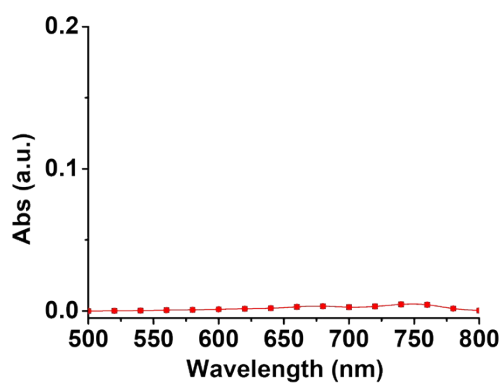

**Fig. S19** UV-Vis absorption spectrum of MB assay for **Nap-Oxy-ONB**.

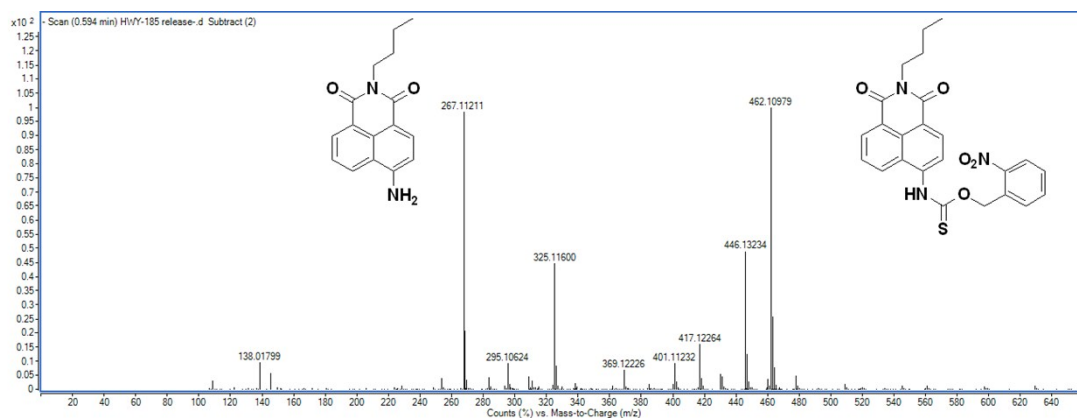

**Fig. S20** ESI-MS diagram of the irradiated **Nap-Sul-ONB**.

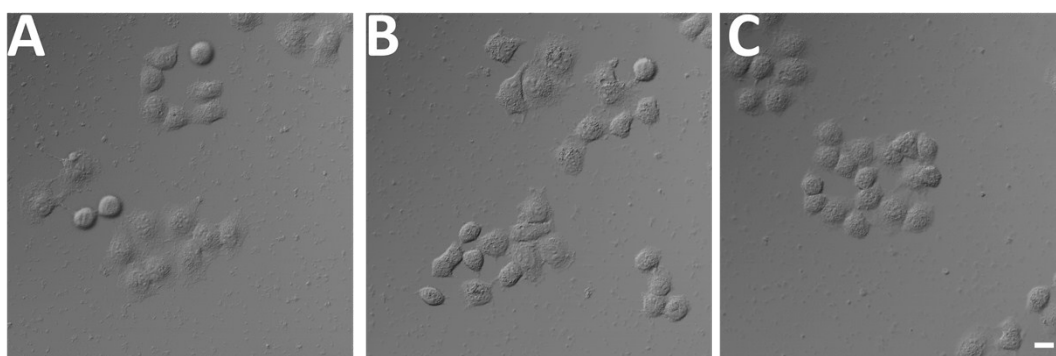

**Fig. S21** Cellular accumulation of **Nap-Sul-ONB** in MCF-7 cells. (A) MCF-7 cells were incubated with 20  $\mu\text{M}$  of **Nap-Sul-ONB** for 4 h in dark. (B) MCF-7 cells were incubated with 20  $\mu\text{M}$  of **Nap-Sul-ONB** for 4 h followed by a further incubation for 20 min. (C) MCF-7 cells were incubated with 20  $\mu\text{M}$  of **Nap-Sul-ONB** for 4 h followed by a further incubation for 40 min.  $\lambda_{\text{ex}}=405$  nm.  $\lambda_{\text{em}}=500\text{-}580$  nm. Scale bar: 20  $\mu\text{m}$ .

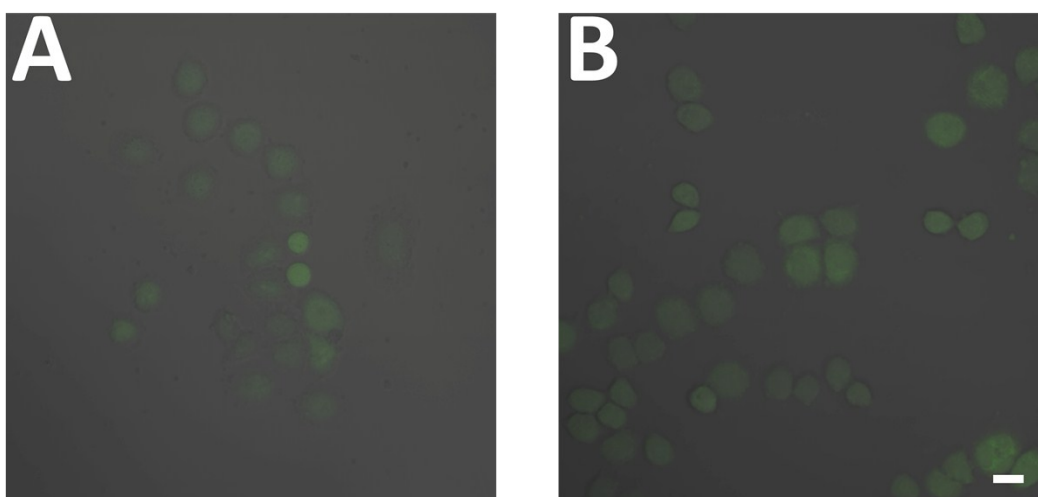

**Fig. S22** Cell images of MCF-7 cells treated with  $\text{H}_2\text{O}_2$  and DCFH-DA. (A) MCF-7 cells were incubated successively with 50  $\mu\text{M}$  of  $\text{H}_2\text{O}_2$  for 30 min and 5  $\mu\text{M}$  of DCFH-DA for 30 min in dark. (B) MCF-7 cells were successively incubated with 50  $\mu\text{M}$  of  $\text{H}_2\text{O}_2$  for 30 min and 5  $\mu\text{M}$  of DCFH-

DA for 30 min and irradiated by 365 nm light for 30 min.  $\lambda_{\text{ex}}=488$  nm.

$\lambda_{\text{em}}=520-550$  nm. Scale bar: 20  $\mu\text{m}$ .

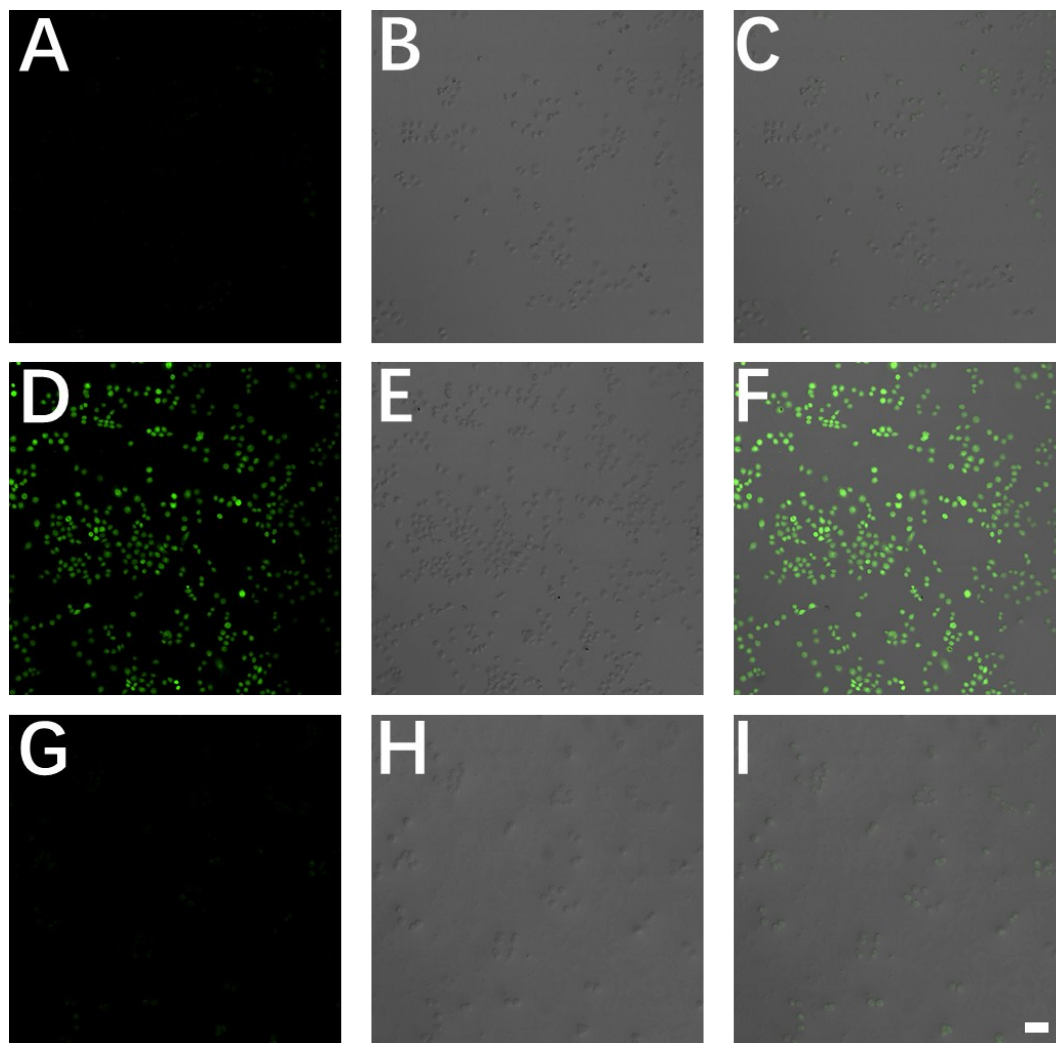

**Fig. S23** Antioxidant activity of **Nap-Sul-ONB** against the ROS formation induced by  $\text{H}_2\text{O}_2$ . The cellular ROS level of MCF-7 cells was detected by DCFH-DA. (A-C) Control. (D-F) MCF-7 cells were pretreated with  $\text{H}_2\text{O}_2$  for 30 min and then incubated with **Nap-Sul-ONB** for 4 h without light irradiation. (G-I) MCF-7 cells were pretreated with  $\text{H}_2\text{O}_2$  for 30 min and then incubated with **Nap-Sul-ONB** for 4 h followed by 365 nm light irradiation for 30 min. (A, D, G) Green channel. (B, E, H) Bright field. (C,

F, I) Merged images.  $\lambda_{\text{ex}}=488$  nm.  $\lambda_{\text{em}}=520-550$  nm. Scale bar: 80  $\mu\text{m}$ .

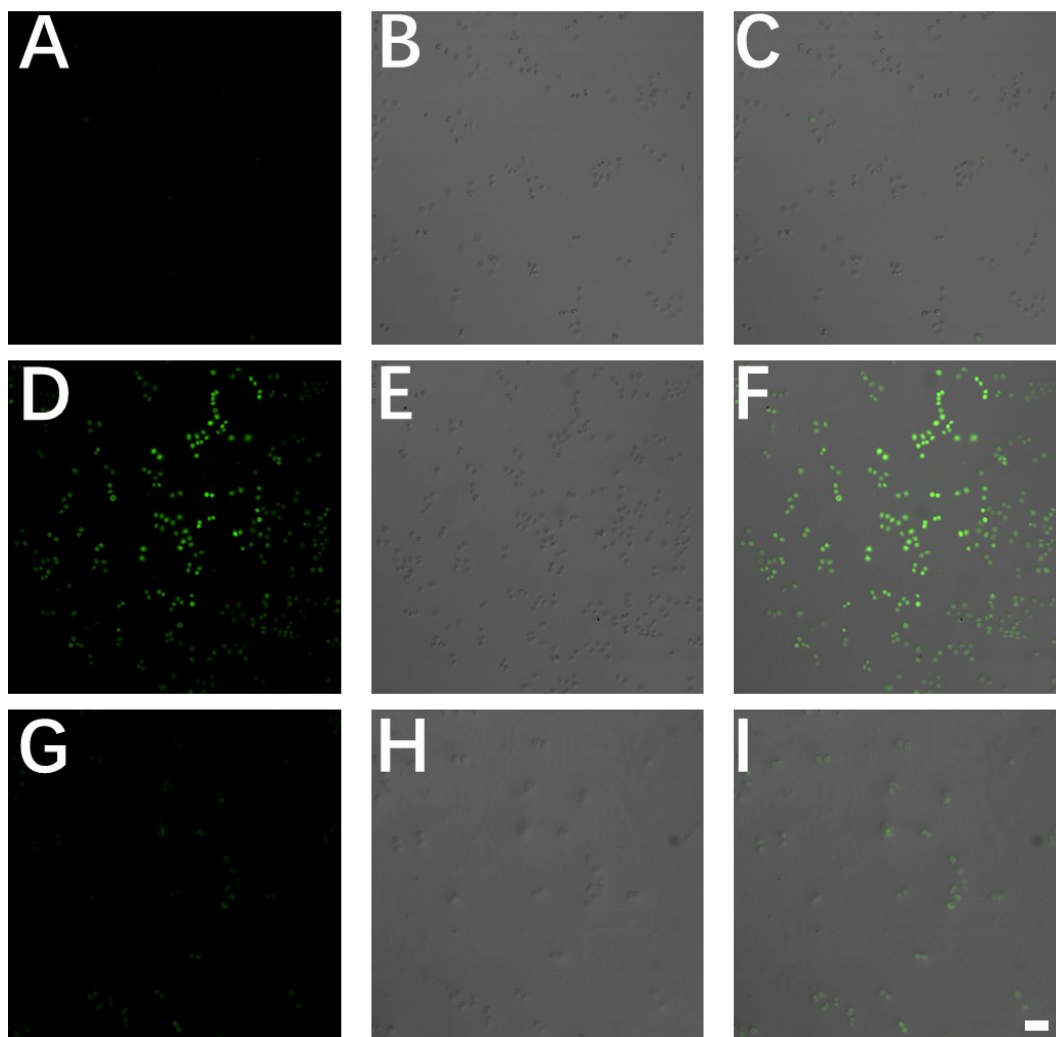

**Fig. S24** Antioxidant activity of **Nap-Sul-ONB** against the ROS formation induced by PMA. The cellular ROS level of MCF-7 cells was detected by DCFH-DA. (A-C) Control. (D-F) MCF-7 cells were pretreated with PMA for 30 min and then incubated with **Nap-Sul-ONB** for 4 h without light irradiation. (G-I) MCF-7 cells were pretreated with PMA for 30 min and then incubated with **Nap-Sul-ONB** for 4 h followed by 365 nm light irradiation for 30 min. (A, D, G) Green channel. (B, E, H) Bright field. (C, F, I) Merged images.  $\lambda_{\text{ex}}=488$  nm.  $\lambda_{\text{em}}=520-550$  nm. Scale bar: 80  $\mu\text{m}$ .



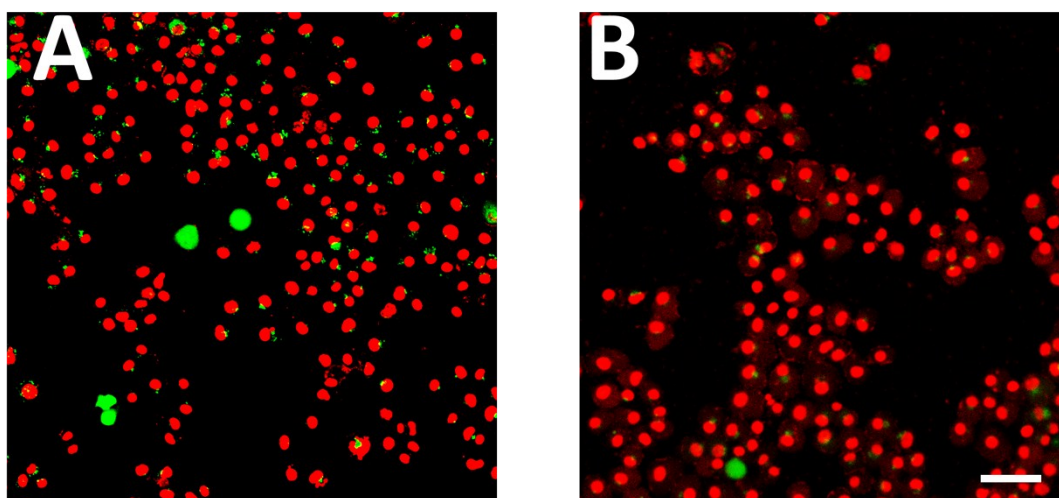

**Fig. S25** Live/dead cell co-staining assay using calcein AM and propidium iodide as fluorescence probes. (A) MCF-7 cells were incubated with 1 µg/mL of PMA for 1 h. (B) MCF-7 cells were incubated with 1 µg/mL of PMA for 1 h and 20 µM of **Nap-Sul-ONB** for 4 h in dark. Scale bar: 80 µm.

**Table S1. Photophysics parameters of the Nap-Sul-ONB before and after 365 nm light irradiation for 20 min.**

|       |                | $\epsilon/(\text{L} \cdot \text{mol}^{-1} \cdot \text{cm}^{-1})$ |               |     | $\lambda_{\text{Em}}/\text{nm}$ | $I_{\text{L}}/I_{\text{D}}^{\text{a}}$ |
|-------|----------------|------------------------------------------------------------------|---------------|-----|---------------------------------|----------------------------------------|
| Dark  | 23681 (255 nm) | 15679 (363 nm)                                                   | 4645 (425 nm) |     |                                 |                                        |
|       |                |                                                                  |               | 544 | 5.5                             |                                        |
| Light | 23667 (255 nm) | 7758 (363 nm)                                                    | 8672 (425 nm) |     |                                 |                                        |

<sup>a</sup>  $I_{\text{L}}/I_{\text{D}} = (\text{Fluorescence intensity of irradiated samples}) / (\text{Fluorescence intensity of samples without irradiation})$ .

### 3. References

1. Y. Zhao, S. G. Bolton, M. D. Pluth, *Org. Lett.* 19 (2017) 2278-2281.
2. C. R. Powell, J. C. Foster, B. Okyere, M. H. Theus, J. B. Matson, *J. Am. Chem. Soc.* 138 (2016) 13477-13480.

3. S. Sestito, L. Pruccoli, M. Runfola, V. Citi, A. Martelli, G. Saccomanni, V. Calderone, A. Tarozzi, S. Rapposelli, *Eur. J. Med. Chem.* 184 (2019) 11745-11757.
4. Y. Hu, X. Li, Y. Fang, W. Shi, X. Li, W. Chen, M. Xian, H. Ma, *Chem. Sci.* 10 (2019) 7690-7694.
5. F. H. Chen, N. Lu, H. W. Zhang, L. Zhao, L. C. He, H. P. Sun, Q. D. You, Z. Y. Li, Q. L. Guo, *Mol. Pharmacol.* 82 (2012) 958-971.
